# Supplementary material
Source: PubMed Central journal article supplement (PMC8447014)
Supplement: MJA2-215-58-s001.pdf [file MJA2-215-58-s001.pdf]

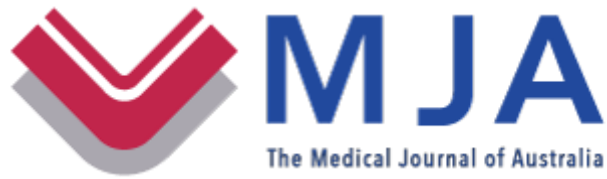

## **Supporting Information**

### **Supplementary material**

This appendix was part of the submitted manuscript and has been peer reviewed.  
It is posted as supplied by the authors.

Appendix to: Seidler AL, Aberoumand M, Williams JG, et al. The landscape of COVID-19 trials in Australia. *Med J Aust* 2021; doi: 10.5694/mja2.51148.

**Table 1. Characteristics of included coronavirus disease 2019 (COVID-19) drug trials (n = 34)**

| <b>Trial ID</b>     | <b>Scientific title</b>                                                                                                                                                                                                                       | <b>Status</b>      | <b>Sample size</b> | <b>Population</b>        | <b>Comorbidity</b> | <b>Drug type</b>                                                                     | <b>Trial purpose</b> |
|---------------------|-----------------------------------------------------------------------------------------------------------------------------------------------------------------------------------------------------------------------------------------------|--------------------|--------------------|--------------------------|--------------------|--------------------------------------------------------------------------------------|----------------------|
| NCT04567810         | A Phase 1 Study in Healthy Participants to Evaluate the Safety, Tolerability, and Pharmacokinetics of Single -Ascending and Multiple Doses of an Anti-Severe Acute Respiratory Syndrome Coronavirus 2 (SARS-CoV-2) Chicken Egg Antibody (IgY) | Recruiting         | 48                 | Healthy volunteers       | None               | Intranasal anti-severe acute respiratory syndrome coronavirus 2 chicken egg antibody | Prevention: other    |
| ACTRN12620001104943 | A Phase 1, Placebo-Controlled, Single Dose, Escalating Dose Study to Determine the Safety and Tolerability of Intranasal REVTx-99 in Healthy Adult Volunteers                                                                                 | Not yet recruiting | 32                 | Healthy volunteers       | None               | Intranasal REVTx-99                                                                  | Prevention: other    |
| ACTRN12620000816954 | A Double-blinded, Randomised, and Placebo-controlled Safety Study of AT-301 Nasal Spray in Healthy Adults                                                                                                                                     | Not yet recruiting | 32                 | Healthy volunteers       | None               | Intranasal AT-301                                                                    | Treatment: drug      |
| NCT04532294         | A First-in-Human, Randomized, Double-Blind, Placebo Controlled, Single Dose Escalation Study to Evaluate the Safety, Tolerability, Pharmacokinetics, and Immunogenicity of SARS-CoV-2 Neutralizing Antibody BGB-DXP593 in Healthy Subjects    | Recruiting         | 30                 | Healthy volunteers       | None               | Intravenous SARS-CoV-2 neutralizing antibody BGB-DXP593                              | Other                |
| ACTRN12620000834954 | A Randomized, Double-Blind, Placebo-Controlled Study to Assess the Safety, Tolerability, Pharmacokinetics, and Pharmacodynamics of Multiple Ascending Doses of GP1681 in Healthy Adult Participants                                           | Not yet recruiting | 24                 | Healthy volunteers       | None               | Oral GP1681                                                                          | Treatment: drug      |
| ACTRN12620000501943 | Effectiveness of Prophylactic Hydroxychloroquine on incidence of COVID-19 infection in Front-line Health and Allied Health Care Workers: The COVID-SHIELD Trial                                                                               | Recruiting         | 2250               | Healthcare professionals | None               | Oral hydroxychloroquine                                                              | Prevention: other    |
| ACTRN12620000473965 | Reducing acute severe respiratory events in health care workers during the Covid-19 pandemic with OM85                                                                                                                                        | Recruiting         | 1000               | Healthcare professionals | None               | Oral OM85                                                                            | Prevention: other    |

| <b>Trial ID</b>     | <b>Scientific title</b>                                                                                                                                                                                                                                                             | <b>Status</b>                        | <b>Sample size</b> | <b>Population</b>                         | <b>Comorbidity</b> | <b>Drug type</b>                 | <b>Trial purpose</b> |
|---------------------|-------------------------------------------------------------------------------------------------------------------------------------------------------------------------------------------------------------------------------------------------------------------------------------|--------------------------------------|--------------------|-------------------------------------------|--------------------|----------------------------------|----------------------|
| ACTRN12620000417987 | Multi-Site, Randomized, Open-Label, Parallel-Group, Placebo-Controlled Study to Assess the Chemoprophylactic Efficacy of Chloroquine Against SARS-CoV-2/COVID-19 in Healthcare Workers at High-Risk of Exposure                                                                     | Recruiting                           | 680                | Healthcare professionals                  | None               | Oral chloroquine                 | Prevention: other    |
| ACTRN12620000843954 | COVID-19 Prevention and Treatment in Cancer; a Sequential Multiple Assignment Randomised Trial; C-SMART study. Arm 1: Effect of daily Interferon-alpha on cancer patients without known positive contact with COVID-19                                                              | Not yet recruiting                   | 1914               | Individuals at high-risk of poor outcomes | Neoplasm           | Intranasal interferon-alpha      | Prevention: other    |
| ACTRN12620000842965 | COVID-19 Prevention and Treatment in Cancer; a Sequential Multiple Assignment Randomised Trial; C-SMART study.<br>Arm 2: Effect of daily Interferon-alpha on cancer patients with known positive contact with COVID-19                                                              | Not yet recruiting                   | 170                | Exposure to COVID-19                      | Neoplasm           | Intranasal interferon-alpha      | Prevention: other    |
| ACTRN12620000588998 | The safety and efficacy of STC3141 in patient with COVID-19 ARDS require intensive care                                                                                                                                                                                             | Withdrawn (recruitment difficulties) | 160                | Suspected/confirmed COVID-19              | None               | Intravenous STC3141              | Treatment: drug      |
| ACTRN12620000445976 | Australasian COVID-19 Trial (ASCOT). A multi-centre randomised clinical trial to assess clinical, virological and immunological outcomes in patients with SARS-CoV-2 infection (COVID-19) treated with lopinavir/ritonavir and/or hydroxychloroquine compared with standard of care | Recruiting                           | 2500               | Confirmed COVID-19                        | None               | Intravenous convalescent plasma* | Treatment: drug      |
| NCT04483960         | An International Multi-Centre Randomised Clinical Trial to Assess the Clinical, Virological and Immunological Outcomes in Patients Diagnosed With SARS-CoV-2 Infection (COVID-19)                                                                                                   | Recruiting                           | 2400               | Confirmed COVID-19                        | None               | Intravenous convalescent plasma  | Treatment: drug      |
| NCT04382924         | A Randomized Open Label Phase 2b/3 Study of the Safety and Efficacy of NP-120 (Ifenprodil) for the Treatment of Hospitalized Patient With Confirmed                                                                                                                                 | Recruiting                           | 682                | Confirmed COVID-19                        | None               | Oral NP-120 (Ifenprodil)         | Treatment: drug      |

| Trial ID            | Scientific title                                                                                                                                                                                                                    | Status             | Sample size | Population         | Comorbidity                                                                  | Drug type                                | Trial purpose   |
|---------------------|-------------------------------------------------------------------------------------------------------------------------------------------------------------------------------------------------------------------------------------|--------------------|-------------|--------------------|------------------------------------------------------------------------------|------------------------------------------|-----------------|
|                     | COVID-19 Disease                                                                                                                                                                                                                    |                    |             |                    |                                                                              |                                          |                 |
| NCT04394117         | Controlled evaluation of Angiotensin Receptor Blockers for COVID-19 respiratory Disease                                                                                                                                             | Recruiting         | 605         | Confirmed COVID-19 | None                                                                         | Oral angiotensin II receptor blockers    | Treatment: drug |
| ACTRN12620000982910 | A randomized double-blind placebo-controlled trial of oral ivermectin outpatient treatment, to prevent hospitalisation, of those at high risk for hospitalization due to SARS-CoV-2 (COVID-19)                                      | Not yet recruiting | 400         | Confirmed COVID-19 | Circulatory system disease, respiratory system disease and endocrine disease | Oral ivermectin                          | Treatment: drug |
| NCT04439071         | Evaluation of the Efficacy and Safety of PTC299 in Hospitalized Subjects With COVID-19 (FITE19)                                                                                                                                     | Recruiting         | 380         | Confirmed COVID-19 | None                                                                         | Oral PTC299                              | Treatment: drug |
| NCT03808922         | A Phase III Randomized Placebo-Controlled Study to Examine the Efficacy and Safety of DAS181 for the Treatment of Lower Respiratory Tract Parainfluenza Infection in Immunocompromised Subjects                                     | Recruiting         | 250         | Confirmed COVID-19 | None                                                                         | Nebulised DAS181                         | Treatment: drug |
| ACTRN12620000557932 | Therapies to prevent progression of COVID-19, including Hydroxychloroquine, Azithromycin, Zinc, Vitamin D, Vitamin B12 with or without Vitamin C, a multi-centre, international, randomized trial: The International ALLIANCE Study | Recruiting         | 200         | Confirmed COVID-19 | None                                                                         | Intravenous vitamin C (sodium ascorbate) | Treatment: drug |
| NCT04445467         | An Adaptive Randomised Placebo Controlled Phase II Trial of Antivirals for COVID-19 Infection                                                                                                                                       | Recruiting         | 190         | Confirmed COVID-19 | None                                                                         | Oral favipiravir                         | Treatment: drug |
| ACTRN12620000731998 | Safety and efficacy of a pharmacological strategy using Losartan in hospital patients with COVID-19                                                                                                                                 | Not yet recruiting | 36          | Confirmed COVID-19 | None                                                                         | Oral losartan                            | Treatment: drug |
| ACTRN12620000788976 | Safety and efficacy of intranasal delivery of                                                                                                                                                                                       | Not yet            | 30          | Confirmed          | None                                                                         | Intranasal bromelain                     | Treatment:      |

| Trial ID            | Scientific title                                                                                                                                                                                 | Status             | Sample size | Population         | Comorbidity | Drug type                                                   | Trial purpose     |
|---------------------|--------------------------------------------------------------------------------------------------------------------------------------------------------------------------------------------------|--------------------|-------------|--------------------|-------------|-------------------------------------------------------------|-------------------|
|                     | BromAc® (Bromelain & Acetylcysteine) in swab positive SARS-CoV-2 patients – inactivating the COVID-19 virus by cleavage of the spike and other glycoproteins                                     | recruiting         |             | COVID-19           |             | and acetylcysteine                                          | drug              |
| ACTRN12620000470998 | Virucidal pilot study of Nasodine® Antiseptic Nasal Spray (povidone-iodine 0.5%) in people with COVID-19 and confirmed nasal shedding of SARS-CoV-2 virus                                        | Not yet recruiting | 20          | Confirmed COVID-19 | None        | Intranasal Nasodine Antiseptic Spray (povidone-iodine 0.5%) | Prevention: other |
| NCT04323761         | Expanded Access Treatment Protocol: Remdesivir (RDV; GS-5734) for the Treatment of SARS-CoV2 (CoV) Infection                                                                                     | Completed          | N/A         | Confirmed COVID-19 | None        | Intravenous remdesivir                                      | Not available     |
| ACTRN12620000517976 | A randomised controlled trial of Nebulised Heparin in critically ill mechanically ventilated patients with COVID-19 to assess the effect on the duration of mechanical ventilation.              | Recruiting         | 206         | Severe COVID-19    | None        | Nebulised heparin                                           | Treatment: drug   |
| ACTRN12620000447954 | Use of therapeutic drug monitoring (TDM) to optimise oral/enteral hydroxychloroquine dosing in critically ill patients with COVID-19                                                             | Recruiting         | 150         | Severe COVID-19    | None        | Oral/enteral hydroxychloroquine                             | Treatment: drug   |
| ACTRN12620000454976 | High-dose intravenous zinc (HDIVZn) as adjunctive therapy in COVID-19 positive critically ill patients: A pilot randomized controlled trial                                                      | Recruiting         | 160         | Severe COVID-19    | None        | Intravenous high dose zinc                                  | Treatment: drug   |
| ACTRN12620000841976 | COVID-19 Prevention and Treatment in Cancer; a Sequential Multiple Assignment Randomised Trial; C-SMART study.<br>Arm 3: Effect of selinexor in cancer patients with moderate COVID-19 infection | Not yet recruiting | 126         | Moderate COVID-19  | Neoplasm    | Oral selinexor                                              | Treatment: drug   |
| ACTRN12620000478910 | Cord Blood Therapy to prevent progression of COVID-19 related pneumonia                                                                                                                          | Not yet recruiting | 24          | Moderate COVID-19  | None        | Intravenous cord blood therapy                              | Treatment: drug   |
| ACTRN12620000840987 | Phase I trial on safety and tolerability of bone-marrow derived mesenchymal stromal cells (MSC)                                                                                                  | Recruiting         | 10          | Moderate COVID-19  | None        | Intravenous bone-marrow derived                             | Treatment: drug   |

| Trial ID            | Scientific title                                                                                                                                                                               | Status             | Sample size | Population      | Comorbidity | Drug type                                                                  | Trial purpose   |
|---------------------|------------------------------------------------------------------------------------------------------------------------------------------------------------------------------------------------|--------------------|-------------|-----------------|-------------|----------------------------------------------------------------------------|-----------------|
|                     | for deteriorating COVID-19 pneumonia                                                                                                                                                           |                    |             |                 |             | mesenchymal stromal cells                                                  |                 |
| ACTRN12620000580976 | Tocilizumab for the treatment of COVID-19 in intensive care patients: effect on days free of ventilatory support                                                                               | Not yet recruiting | 150         | Severe COVID-19 | None        | Intravenous tocilizumab                                                    | Treatment: drug |
| ACTRN12620000844943 | COVID-19 Prevention and Treatment in Cancer; a Sequential Multiple Assignment Randomised Trial; C-SMART study<br>Arm 4: Effect of Lenzilumab in cancer patients with severe COVID-19 infection | Not yet recruiting | 72          | Severe COVID-19 | Neoplasm    | Intravenous lenzilumab                                                     | Treatment: drug |
| ACTRN12620000676910 | Allogeneic Amniotic Epithelial Cells for the Treatment of COVID-19 related respiratory failure, a pilot feasibility randomised controlled trial                                                | Not yet recruiting | 40          | Severe COVID-19 | None        | Intravenous allogeneic amniotic epithelial cells                           | Treatment: drug |
| ACTRN12620000612910 | A pilot, open-label, randomised controlled clinical trial to investigate early efficacy of CYP-001 in adults admitted to intensive care with COVID-19                                          | Recruiting         | 24          | Severe COVID-19 | None        | Intravenous allogeneic mesenchymoangioblast-derived mesenchymal stem cells | Treatment: drug |

ARDS = acute respiratory distress syndrome; SARS-CoV-2 = severe acute respiratory syndrome coronavirus 2. \* Trial arms were adapted and changes were not reflected through trial registration as of 16 November 2020.

**Table 2. Characteristics of all included coronavirus disease 2019 (COVID-19) vaccine trials (n = 10)**

| Trial ID            | Scientific title                                                                                                                                                                                                                                                                                | Status     | Sample size | Population         | Comorbidity | Vaccine type                                                                                             | Trial purpose       |
|---------------------|-------------------------------------------------------------------------------------------------------------------------------------------------------------------------------------------------------------------------------------------------------------------------------------------------|------------|-------------|--------------------|-------------|----------------------------------------------------------------------------------------------------------|---------------------|
| NCT04368988         | A 2-Part, Phase 1/2, Randomized, Observer-Blinded Study To Evaluate The Safety And Immunogenicity Of A SARS-CoV-2 Recombinant Spike Protein Nanoparticle Vaccine (SARS-CoV-2 rS) With Or Without MATRIX-M™ Adjuvant In Healthy Subjects                                                         | Recruiting | 1419        | Healthy volunteers | None        | Intramuscular SARS-CoV-2 recombinant Spike protein nanoparticle vaccine                                  | Prevention: vaccine |
| ACTRN12620000817943 | A randomized, observer-blind, placebo-controlled, Phase I/II study to evaluate the safety, reactogenicity and immunogenicity of Receptor Binding Domain (RBD) SARS-CoV-2 (COVID-19) Hepatitis B surface antigen (HBsAg) virus like particle (VLP) Vaccine in Healthy Adults                     | Recruiting | 280         | Healthy volunteers | None        | Intramuscular receptor binding domain SARS-CoV-2 Hepatitis B surface antigen virus like particle vaccine | Treatment: other    |
| NCT04495933         | A Phase 1, Randomised, Double-Blind, Placebo-Controlled, Dosage-Escalation, Single Centre Study to Evaluate the Safety and Immunogenicity of an Adjuvanted SARS-CoV-2 Sclamp Protein Subunit Vaccine in Healthy Adults Aged 18 to 55 Years Old and Healthy Older Adults, Aged 56 Years and Over | Recruiting | 216         | Healthy volunteers | None        | Intramuscular adjuvanted SARS-CoV-2 Sclamp protein subunit vaccine                                       | Prevention: vaccine |
| NCT04405908         | A Phase 1, Randomized, Double-blind, Placebo-controlled, First-in-human Study to Evaluate the Safety and Immunogenicity of SCB 2019, a Recombinant SARS-CoV-2 Trimeric S Protein Subunit Vaccine for COVID-19 in Healthy Volunteers                                                             | Recruiting | 150         | Healthy volunteers | None        | Intramuscular recombinant SARS-CoV-2 trimeric S protein subunit vaccine                                  | Prevention: vaccine |
| ACTRN12620000674932 | A Phase 1 Randomised, Double-Blind, Placebo-Controlled, Dosage-Escalation, Single Centre Study To Evaluate The Safety And Immunogenicity Of An Adjuvanted SARS-CoV-2 Sclamp Protein Subunit Vaccine (COVID-19 vaccine) In Healthy Adults Aged 18 To 55 Years Old                                | Recruiting | 120         | Healthy volunteers | None        | Intramuscular adjuvanted SARS-CoV-2 Sclamp protein subunit vaccine                                       | Prevention: vaccine |

| <b>Trial ID</b>     | <b>Scientific title</b>                                                                                                                                                                                                                    | <b>Status</b>                  | <b>Sample size</b> | <b>Population</b>                         | <b>Comorbidity</b>                                                           | <b>Vaccine type</b>                                                      | <b>Trial purpose</b> |
|---------------------|--------------------------------------------------------------------------------------------------------------------------------------------------------------------------------------------------------------------------------------------|--------------------------------|--------------------|-------------------------------------------|------------------------------------------------------------------------------|--------------------------------------------------------------------------|----------------------|
| NCT04453852         | A Randomised, Controlled, Phase 1 Study to Evaluate the Safety and Immunogenicity of a Candidate Adjuvanted Recombinant Protein SARS-COV-2 Vaccine in Healthy Adult Subjects                                                               | Recruiting                     | 40                 | Healthy volunteers                        | None                                                                         | Intramuscular adjuvanted recombinant protein SARS-COV-2 vaccine          | Prevention: vaccine  |
| NCT04334980         | A Phase 1, Randomized, Observer-Blind, Placebo-Controlled Trial to Evaluate the Safety, Tolerability and Immunogenicity of the bacTRL-Spike Oral Candidate Vaccine for the Prevention of COVID-19 in Healthy Adults                        | Not yet recruiting             | 12                 | Healthy volunteers                        | None                                                                         | Oral bacTRL-Spike vaccine                                                | Prevention: vaccine  |
| ACTRN12620000707965 | A Multicenter, Phase III, Double-Blind, Randomized, Placebo-Controlled Study to Evaluate the Efficacy of the recombinant BCG VPM1002 on the Incidence or Disease Severity of SARS-COV-2/COVID-19 Among High-Risk Participants in Australia | Withdrawn (commercial reasons) | 3468               | Individuals at high-risk of poor outcomes | Circulatory system disease, respiratory system disease and endocrine disease | Intramuscular recombinant Bacillus Calmette–Guérin (BCG) vaccine VPM1002 | Treatment: other     |
| NCT04333732         | An International, Multi-site, Bayesian Platform Adaptive, Randomized, Placebo-controlled Trial Assessing the Effectiveness of Candidate Agents in Mitigating COVID-19 Disease in Healthcare Workers                                        | Not yet recruiting             | 30000              | Healthcare professionals                  | None                                                                         | Adaptive design*                                                         | Prevention: vaccine  |
| NCT04327206         | BCG Vaccination to Reduce the Impact of COVID-19 in Healthcare Workers Following Coronavirus Exposure (BRACE) Trial                                                                                                                        | Recruiting                     | 10078              | Healthcare professionals                  | None                                                                         | Intramuscular BCG vaccine                                                | Prevention: vaccine  |

SARS-CoV-2 = severe acute respiratory syndrome coronavirus 2. \* Trials with adaptive design are subject to change and have been grouped as per information current on the 16 November 2020.



**Table 3. Characteristics of all other included coronavirus disease 2019 (COVID-19) trials (n = 12)**

| Trial ID            | Scientific title                                                                                                                                                                                                                                                                                                                                                              | Recruitment status | Sample size | Population                   | Comorbidity | Intervention type                                                        | Trial purpose     |
|---------------------|-------------------------------------------------------------------------------------------------------------------------------------------------------------------------------------------------------------------------------------------------------------------------------------------------------------------------------------------------------------------------------|--------------------|-------------|------------------------------|-------------|--------------------------------------------------------------------------|-------------------|
| ACTRN12620000477921 | The use of a simplified negative pressure cuirass style ventilator under COVID-19 pandemic conditions in support of critically overwhelmed healthcare systems                                                                                                                                                                                                                 | Completed          | 1           | Healthy volunteers           | None        | Simplified negative pressure cuirass style ventilator                    | Treatment: other  |
| ACTRN12620000688987 | Comparing the user seal check and fit test between two types of N95 respirators in anaesthetic staff members - the Halyard N95 Particulate Filter Respirators and the ProShield® N-95 masks                                                                                                                                                                                   | Completed          | 80          | Healthcare professional      | None        | Halyard N95 Particulate Filter Respirators and the ProShield® N-95 masks | Treatment: other  |
| ACTRN12620000579998 | Simulation time taken among consultant anaesthetists to perform spinal anaesthesia or general anaesthesia for COVID-19 patients requiring an emergency category 1 caesarean delivery                                                                                                                                                                                          | Not yet recruiting | 10          | Healthcare professional      | None        | Anaesthesia                                                              | Other             |
| ACTRN12620000640909 | A phase II, open label non-randomised clinical trial of the safety and efficacy of the CovidCare app to support self-monitoring for COVID-19 symptoms in self-isolation and to determine the impacts on mental health                                                                                                                                                         | Not yet recruiting | 200         | Exposure to COVID-19         | None        | CovidCare app                                                            | Treatment: other  |
| ACTRN12620000698976 | Does a Health Package of exercise and advice on anxiety management and nutrition improve outcomes and experiences of patients with COVID-19 isolated at home or Special Health Accommodation under the care of Royal Prince Alfred (RPA) Virtual Hospital and those without COVID-19 quarantined in Sydney Local Health District Special Health Accommodation?: a pilot trial | Recruiting         | 40          | Exposure to COVID-19         | None        | Exercise and advice on anxiety management and nutrition                  | Prevention: other |
| ACTRN12620000472976 | Adapting the Decathlon Group Easybreathe® snorkelling face mask for the safer administration of oxygen and/or continuous positive airway pressure                                                                                                                                                                                                                             | Not yet recruiting | 100         | Suspected/confirmed COVID-19 | None        | Decathlon Group Easybreathe® snorkelling face                            | Treatment: other  |

| <b>Trial ID</b>      | <b>Scientific title</b>                                                                                                                                                                                                                                                              | <b>Recruitment status</b> | <b>Sample size</b> | <b>Population</b>  | <b>Comorbidity</b>                                                                                                                    | <b>Intervention type</b>                                | <b>Trial purpose</b> |
|----------------------|--------------------------------------------------------------------------------------------------------------------------------------------------------------------------------------------------------------------------------------------------------------------------------------|---------------------------|--------------------|--------------------|---------------------------------------------------------------------------------------------------------------------------------------|---------------------------------------------------------|----------------------|
|                      | and in the intra/interhospital transportation of patients with proven or suspected COVID 19 infection                                                                                                                                                                                |                           |                    |                    |                                                                                                                                       | mask ventilator                                         |                      |
| ACTRN12620000524998  | ReCOVER (Remote COVID-19 Evaluation and Response): a prospective non-randomised controlled trial to evaluate the effect of a novel smartphone application-centric model of care for the remote monitoring of COVID-19 patients in the community, on avoidable hospital presentations | Not yet recruiting        | 2000               | Confirmed COVID-19 | None                                                                                                                                  | Remote monitoring smartphone application and care model | Treatment: other     |
| ACTRN12620000566932  | BEAT COVID-19: A Bayesian adaptive randomised controlled trial platform to evaluate the efficacy of interventions for high risk older patients with COVID-19 in reducing the risk of hospital admission or death                                                                     | Not yet recruiting        | 400                | Confirmed COVID-19 | Circulatory system disease, respiratory system disease, nervous system disease, immune system disease, endocrine disease and neoplasm | Treatments or interventions*                            | Treatment: other     |
| ACTRN12620000443998  | Home telerehabilitation for people with COVID-19: Implementing telehealth approaches to care and its effect on reintegration into the community                                                                                                                                      | Not yet recruiting        | 58                 | Confirmed COVID-19 | None                                                                                                                                  | Home tele rehabilitation                                | Treatment: other     |
| ACTRN 12620000635965 | Open label, prospective study for the Biofourmis Everion armband telemonitoring solution for patients during COVID-19 home isolation within South West Sydney to assess the feasibility and suitability of the Everion armband device in the telemonitoring of                       | Not yet recruiting        | 50                 | Confirmed COVID-19 | None                                                                                                                                  | Biofourmis Everion armband telemonitoring solution      | Prevention: other    |

| <b>Trial ID</b>     | <b>Scientific title</b>                                                                                                                                                                                                   | <b>Recruitment status</b> | <b>Sample size</b> | <b>Population</b>  | <b>Comorbidity</b> | <b>Intervention type</b>               | <b>Trial purpose</b> |
|---------------------|---------------------------------------------------------------------------------------------------------------------------------------------------------------------------------------------------------------------------|---------------------------|--------------------|--------------------|--------------------|----------------------------------------|----------------------|
|                     | COVID-19 high risk patients under home isolation period                                                                                                                                                                   |                           |                    |                    |                    |                                        |                      |
| ACTRN12620000500954 | A reusable personalised ventilation hood for care of patients with suspected or confirmed COVID-19 in the intensive care, emergency and respiratory healthcare settings: A phase 1 safety study of a new device (McMonty) | Not yet recruiting        | 20                 | Confirmed COVID-19 | None               | Reusable personalised ventilation hood | Prevention: other    |
| ACTRN12620000740998 | A Randomised Controlled Trial of Early Prone Positioning to Improve Oxygenation in Non-Intubated Adults Admitted to Intensive Care with COVID-19                                                                          | Not yet recruiting        | 20                 | Confirmed COVID-19 | None               | Early prone positioning                | Treatment: other     |

\* Trials with adaptive design are subject to change and have been grouped as per information current on the 16 November 2020.

**Table 4. Characteristics of coronavirus disease 2019 (COVID-19)-related trials (n = 12)**

| Trial ID*            | Scientific title                                                                                                                                                               | Status             | Sample size <sup>†</sup> | Population                                                                                                      | Health area   | Health area specifics                        | Intervention details                                                                                                                                                                                                                   |
|----------------------|--------------------------------------------------------------------------------------------------------------------------------------------------------------------------------|--------------------|--------------------------|-----------------------------------------------------------------------------------------------------------------|---------------|----------------------------------------------|----------------------------------------------------------------------------------------------------------------------------------------------------------------------------------------------------------------------------------------|
| ACTRN12620000975998  | Feasibility and acceptability of a volunteer-peer telephone support programme for individuals diagnosed with COVID-19                                                          | Not yet recruiting | 100                      | Persons diagnosed with COVID or in close contact with COVID who accessed healthcare by Northern Health Victoria | Mental health | Depression, loneliness and social isolation  | Weekly phone calls (20-40 min) from volunteers (supported by psychologists) for a 12-week period, social in nature. No control, all participants tracked over time.                                                                    |
| ACTRN12620000811909p | Randomised Controlled Trial of Positive Mood Training versus Enhanced Treatment as Usual on Anxiety and Depression in People Distressed by COVID-19                            | Not yet recruiting | 240                      | Persons suffering anxiety and depression                                                                        | Mental health | Depression and anxiety                       | Random allocation to Positive Mood Training (weekly 60 min video-conference sessions for 7 weeks with psychologist) or Enhanced Treatment as Usual (provided a self-guided manual).                                                    |
| ACTRN12620000787987p | Randomised Controlled Trial of Problem Management Plus versus Enhanced Treatment as Usual on Anxiety and Depression in People Distressed by Financial Problems Due to COVID-19 | Not yet recruiting | 206                      | Persons suffering psychological distress                                                                        | Mental health | Depression and anxiety                       | Random allocation to Problem Management Plus program (weekly 60 min video-conference sessions for 7 weeks with psychologist) or Enhanced Treatment as Usual (access to a self-guided problem management plus manual).                  |
| ACTRN12620000779976  | A pragmatic study to disseminate low intensity, evidence supported Cognitive behaviour therapy and the effect on anxiety and depression in adults during the COVID-19 pandemic | Recruiting         | 100                      | Individuals accessing mental health services                                                                    | Mental health | Depression and anxiety                       | Participants are provided a self-help guide on Cognitive Behaviour therapy upon completion of registration (immediate group) or one week after registration and following post-intervention questionnaire completion (waitlist group). |
| ACTRN12620000636954p | COACHING FOR COVID-19: A Pilot Study Investigating the Effectiveness of Coaching on                                                                                            | Not yet recruiting | 35                       | Senior doctors employed by Liverpool Hospital                                                                   | Mental health | Depression, anxiety, other mental health and | Doctors are matched with a coach and meet via Zoom (1 x 30 min intro, 1 x 60 min first session, followed by 5 x 30 min                                                                                                                 |

|                      |                                                                                                                                                      |                    |     |                                                                                            |                                            |                                                    |                                                                                                                                                                                                                                    |
|----------------------|------------------------------------------------------------------------------------------------------------------------------------------------------|--------------------|-----|--------------------------------------------------------------------------------------------|--------------------------------------------|----------------------------------------------------|------------------------------------------------------------------------------------------------------------------------------------------------------------------------------------------------------------------------------------|
|                      | Psychological Outcomes in Hospital-Based Senior Doctors                                                                                              |                    |     |                                                                                            |                                            | Healthcare professionals                           | sessions at 3-week intervals) where psychological stress will be monitored throughout.                                                                                                                                             |
| ACTRN12620000571976  | Evaluation of Shift, a smartphone application for New South Wales Junior Medical Officers, on depression and anxiety during the COVID-19 epidemic.   | Completed          | 75  | Junior medical officers in NSW                                                             | Mental health                              | Depression, anxiety and healthcare professionals   | Participants are all provided with access to the 'Shift' app to address pandemic-related concerns. Participants can use 2-5 activities (of a total 51) per week. Pre- and post-assessment is made.                                 |
| ACTRN12620000555954  | Randomised controlled trial of an app-based intervention, Anchored, to support the mental health of Australians recently unemployed due to COVID-19. | Completed          | 492 | Persons who are unemployed as a result of COVID-19 and experiencing symptomatic depression | Mental health                              | Anxiety, depression, suicide and unemployment      | Random allocation to the 'Anchored' smartphone app (5-10 min completed daily) or given access to a psycho-educational online resources for a 30-day period.                                                                        |
| ACTRN12620000468921p | Randomised Controlled Trial of Problem Management Plus versus Enhanced Treatment as Usual on Anxiety and Depression in People Distressed by Covid 19 | Not yet recruiting | 140 | Persons suffering psychological distress                                                   | Mental health                              | Depression and anxiety                             | Random allocation to Problem Management Plus program (weekly 60 min video-conference sessions for 6 weeks with psychologist) or Enhanced Treatment as Usual (access to a website outlining evidence-based mindfulness strategies). |
| NCT04602312          | Online RCT Comparing the Effects of Mindfulness, Sham Mindfulness and Book Listening Control on Coronavirus-related Catastrophizing in Adults        | Recruiting         | 624 | Healthy individuals                                                                        | Mental health                              | Anxiety, stress and catastrophizing                | Random allocation to mindfulness meditation, specific sham mindfulness meditation, general sham mindfulness meditation or book listening control via 1 x 20 min online audio training.                                             |
| ACTRN12620000448943  | Expressive Writing To Combat Distress Associated With The COVID-19 Pandemic In People With Inflammatory Bowel Disease                                | Recruiting         | 154 | Person diagnosed with inflammatory bowel disease and suffering mild distress               | Mental health and gastrointestinal disease | Depression, anxiety and inflammatory bowel disease | Random allocation to an expressive/gratitude writing program (4 x 30 min sessions in one week writing about their inflammatory bowel disease based on an evidence based writing program) or an active control (4 x 30              |

|                      |                                                                                                                                                                                                                |                    |     |                                                                                                        |                                     |                                                  |                                                                                                                                                                                                                                                                                                         |
|----------------------|----------------------------------------------------------------------------------------------------------------------------------------------------------------------------------------------------------------|--------------------|-----|--------------------------------------------------------------------------------------------------------|-------------------------------------|--------------------------------------------------|---------------------------------------------------------------------------------------------------------------------------------------------------------------------------------------------------------------------------------------------------------------------------------------------------------|
|                      |                                                                                                                                                                                                                |                    |     |                                                                                                        |                                     |                                                  | min sessions in one week writing about trivial topics). Both sessions conducted by researcher with psychology degree.                                                                                                                                                                                   |
| ACTRN12620000492954p | Feasibility of a Facebook delivered physical activity focused group lifestyle intervention for older adults during the COVID-19 pandemic                                                                       | Not yet recruiting | 20  | Healthy individuals >60 years living alone                                                             | Mental health and physical activity | Depression, physical inactivity and older adults | Participants receive weekly information and contribute to conversations on topics relating to physical activity for a 6-week period through a private Facebook group, delivered by an exercise physiologist and dietitian. Participants can also join 20-30 min Zoom calls organised twice each week.   |
| ACTRN12620000860965  | A randomised controlled trial on the effect of a smart device enabled monitoring system on management of heart failure among patients with pre-existing left ventricular dysfunction during COVID-19 isolation | Not yet recruiting | 400 | Persons with left ventricular dysfunction or heart failure who do not have impaired cognitive function | Cardiovascular disease              | Heart failure, and cardiac rehabilitation        | Random allocation of access to a smartphone app, in addition to standard care to manage cardiac rehabilitation at home. Daily reporting of blood pressure, medication adherence, task completion, stress, heart rate, goals and patient reported outcomes. Entries are reviewed by patient's clinician. |

\* Provisional trials are indicated with a 'p', and have been submitted but not yet approved by the ANZCTR. † Sample size represents the target sample size as indicated on the trial record.

**Table 5. Definition of coronavirus disease 2019 (COVID-19) core outcomes\***

| Outcome             | Definition                                                                                                                                                                                                                                                                             |
|---------------------|----------------------------------------------------------------------------------------------------------------------------------------------------------------------------------------------------------------------------------------------------------------------------------------|
| Mortality           | Patient mortality; patient death; patient survival                                                                                                                                                                                                                                     |
| Respiratory failure | Patient respiratory failure; patient need for intubation; patient need for mechanical ventilation; duration of patient intubation/ventilation; P/F ratio (arterial PO <sub>2</sub> /FIO <sub>2</sub> ) indicative of acute respiratory distress syndrome (ARDS) or respiratory failure |
| Multi-organ failure | Patient organ failure (other than lung); sequential organ failure assessment (SOFA) score; patient sepsis                                                                                                                                                                              |
| Shortness of breath | Patient shortness of breath; dyspnoea; breaths/min                                                                                                                                                                                                                                     |
| Recovery            | Patient time to recovery; patient recovery; patient number of sick days; patient time to clinical improvement; duration of hospitalisation                                                                                                                                             |

FIO<sub>2</sub> = fraction of inspired oxygen; P/F = arterial partial pressure of oxygen/ fraction of inspired oxygen;  
 PO<sub>2</sub> = partial pressure of oxygen. \* Core outcomes previously outlined, as defined for our study.

**Table 6. Data sharing plans of coronavirus disease 2019 (COVID-19) trials and COVID-19-related trials**

|                                                          | COVID-19 trials | COVID-19-related trials | Overall     |
|----------------------------------------------------------|-----------------|-------------------------|-------------|
| Total number of trials                                   | 56              | 12                      | 68          |
| IPD availability                                         |                 |                         |             |
| Planning on sharing IPD                                  | 10 (20%)        | 4 (36%)                 | 14 (23%)    |
| Not planning on sharing IPD                              | 41 (80%)        | 7 (64%)                 | 48 (77%)    |
| No data sharing plan provided (excluded from percentage) | 5               | 1                       | 6           |
| Reason for trials not planning on sharing IPD            |                 |                         |             |
| No reason                                                | 21/41 (51%)     | 3/7 (43%)               | 24/48 (50%) |
| Analyse aggregate data                                   | 7/41 (17%)      | 1/7 (14%)               | 8/48 (17%)  |
| Undecided                                                | 5/41 (12%)      | 0                       | 5/48 (10%)  |
| Protect participant privacy                              | 3/41 (7%)       | 1/7 (14%)               | 4/48 (8%)   |
| Lack ethical approval                                    | 2/41 (5%)       | 1/7 (14%)               | 3/48 (6%)   |
| No external relevance                                    | 2/41 (5%)       | 0                       | 2/48 (4%)   |
| Not data custodian                                       | 0               | 1/7 (14%)               | 1/48 (2%)   |
| Mechanism accessibility for trials sharing IPD           |                 |                         |             |
| Principal investigator contact                           | 7/10 (70%)      | 4/4 (100%)              | 11/14 (79%) |
| Primary sponsor contact                                  | 3/10 (30%)      | 0                       | 3/14 (21%)  |
| Data repository                                          | 0               | 0                       | 0           |
| Full protocol available                                  | 0               | 0                       | 0           |

IPD = individual participant data.

Figure 1. Flow chart of study selection

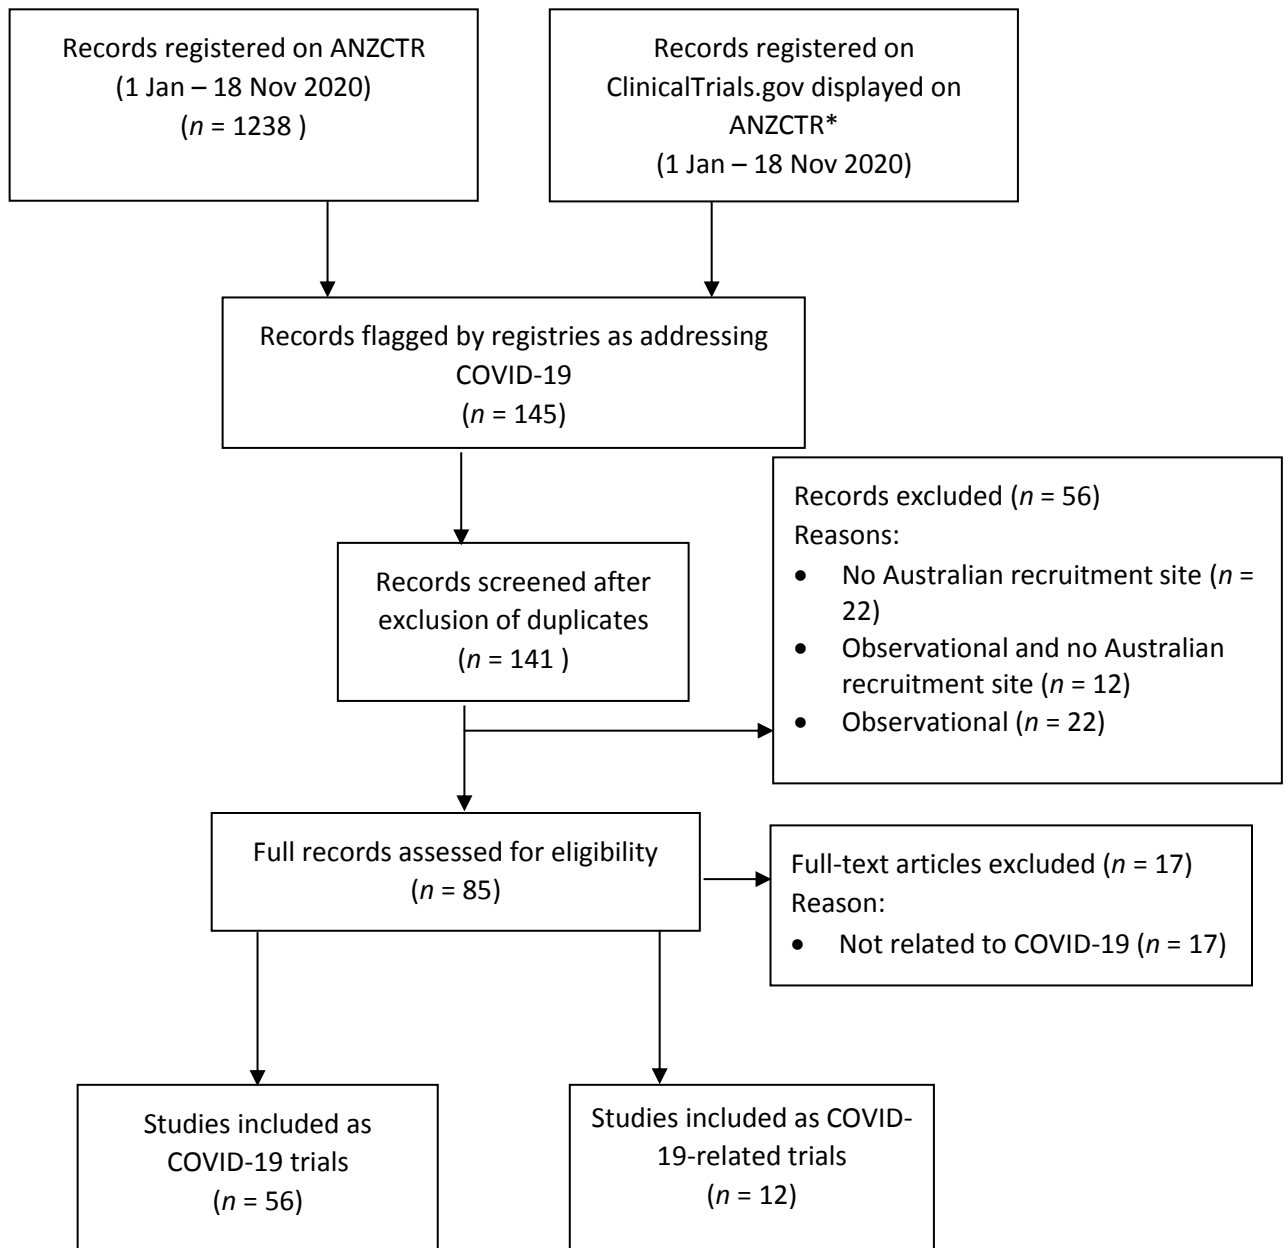

ANZCTR = Australian New Zealand Clinical Trials Registry; COVID-19 = coronavirus disease 2019.



**Figure 2. Power calculations to detect mortality for hospitalised coronavirus disease 2019 (COVID-19) patients**

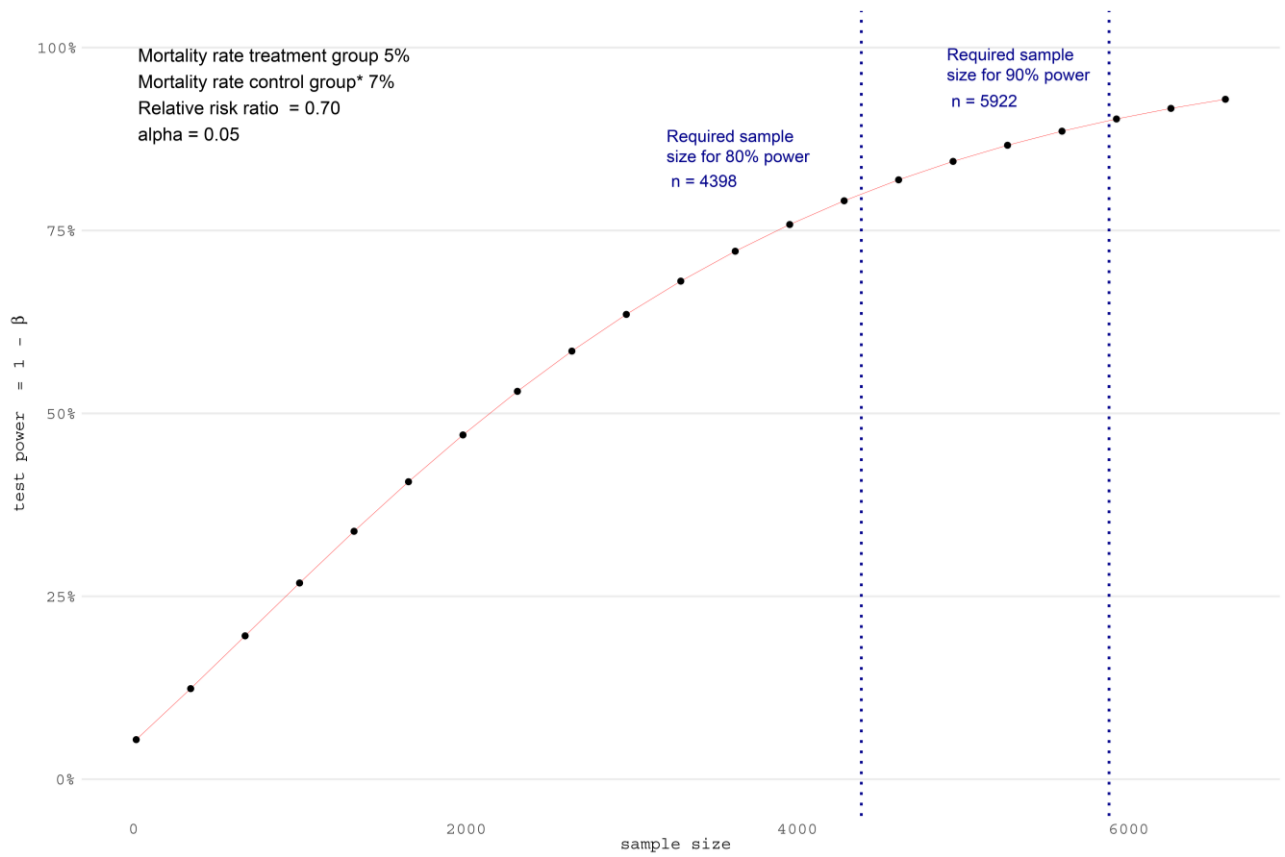

\* Indicative mortality rates have been extracted. <sup>2</sup>

## References

- 1 Tong A, Elliott JH, Azevedo LC, Baumgart A, Bersten A, Cervantes L, et al. Core outcomes set for trials in people with coronavirus disease 2019. *J Crit Care Med* 2020; 48: 1622-1635.
- 2 Dennis JM, McGovern AP, Vollmer SJ, Mateen BA. Improving Survival of Critical Care Patients With Coronavirus Disease 2019 in England: A National Cohort Study, March to June 2020. *J Crit Care Med* 2020; 49: 209-214.
